# Supplementary material
Source: ML conference proceedings conference paper supplement (https://openaccess.thecvf.com/content/CVPR2022/html/Tang_FedCor_Correlation-Based_Active_CVPR_2022_paper.html)
Supplement: Supplementary file 2 [file Tang_FedCor_Correlation-Based_Active_CVPR_2022_supplemental.zip]

Archive with 16 entries (14 files):
- supplemental_material/Codes/
- supplemental_material/Codes/README.md
- supplemental_material/Codes/src/
- supplemental_material/Codes/src/centralized.ipynb
- supplemental_material/Codes/src/federated_main.py
- supplemental_material/Codes/src/GPR.py
- supplemental_material/Codes/src/language_utils.py
- supplemental_material/Codes/src/models.py
- supplemental_material/Codes/src/mvnt.py
- supplemental_material/Codes/src/options.py
- supplemental_material/Codes/src/plot.py
- supplemental_material/Codes/src/sampling.py
- supplemental_material/Codes/src/toy.py
- supplemental_material/Codes/src/update.py
- supplemental_material/Codes/src/utils.py
- supplemental_material/CVPR2022_FedCor_apx.pdf
