# Supplementary material
Source: ML conference proceedings conference paper supplement (https://openaccess.thecvf.com/content/CVPR2022/html/Tang_FedCor_Correlation-Based_Active_CVPR_2022_paper.html)
Supplement: Supplementary file 2 [file Tang_FedCor_Correlation-Based_Active_CVPR_2022_supplemental.zip › supplemental_material/Codes/src/language_utils.py]

"""Utils for language models."""

import re
import numpy as np
import json


# ------------------------
# utils for shakespeare dataset

ALL_LETTERS = "\n !\"&'(),-.0123456789:;>?ABCDEFGHIJKLMNOPQRSTUVWXYZ[]abcdefghijklmnopqrstuvwxyz}"
NUM_LETTERS = len(ALL_LETTERS)


def _one_hot(index, size):
    '''returns one-hot vector with given size and value 1 at given index
    '''
    vec = [0 for _ in range(size)]
    vec[int(index)] = 1
    return vec


def letter_to_index(letter):
    '''returns one-hot representation of given letter
    '''
    return ALL_LETTERS.find(letter)
    


def word_to_indices(word):
    '''returns a list of character indices

    Args:
        word: string
    
    Return:
        indices: int list with length len(word)
    '''
    indices = []
    for c in word:
        indices.append(ALL_LETTERS.find(c))
    return indices


# ------------------------
# utils for sent140 dataset


def split_line(line):
    '''split given line/phrase into list of words

    Args:
        line: string representing phrase to be split
    
    Return:
        list of strings, with each string representing a word
    '''
    return re.findall(r"[\w']+|[.,!?;]", line)


def _word_to_index(word, indd):
    '''returns index of given word based on given lookup dictionary

    returns the length of the lookup dictionary if word not found

    Args:
        word: string
        indd: dictionary with string words as keys and int indices as values
    '''
    if word in indd:
        return indd[word]
    else:
        return len(indd)


def line_to_indices(line, word2id, max_words=25):
    '''converts given phrase into list of word indices
    
    if the phrase has more than max_words words, returns a list containing
    indices of the first max_words words
    if the phrase has less than max_words words, repeatedly appends integer 
    representing unknown index to returned list until the list's length is 
    max_words

    Args:
        line: string representing phrase/sequence of words
        word2id: dictionary with string words as keys and int indices as values
        max_words: maximum number of word indices in returned list

    Return:
        indl: list of word indices, one index for each word in phrase
    '''
    unk_id = len(word2id)
    line_list = split_line(line) # split phrase in words
    indl = [word2id[w] if w in word2id else unk_id for w in line_list[:max_words]]
    indl += [unk_id]*(max_words-len(indl))
    return indl

def idx_to_embedding(idx,emb):

    embs=[emb[line] for line in idx]
    return np.array(embs)# [batch , seq_len , emb_dim]

def bag_of_words(line, vocab):
    '''returns bag of words representation of given phrase using given vocab

    Args:
        line: string representing phrase to be parsed
        vocab: dictionary with words as keys and indices as values

    Return:
        integer list
    '''
    bag = [0]*len(vocab)
    words = split_line(line)
    for w in words:
        if w in vocab:
            bag[vocab[w]] += 1
    return bag


def get_word_emb_arr(path):
    with open(path, 'r') as inf:
        embs = json.load(inf)
    vocab = embs['vocab']
    word_emb_arr = np.array(embs['emba'])
    indd = {}
    # print(len(vocab))
    for i in range(len(vocab)):
        indd[vocab[i]] = i
    vocab = {w: i for i, w in enumerate(embs['vocab'])}
    return word_emb_arr, indd, vocab


def val_to_vec(size, val):
    """Converts target into one-hot.

    Args:
        size: Size of vector.
        val: Integer in range [0, size].
    Returns:
         vec: one-hot vector with a 1 in the val element.
    """
    assert 0 <= val < size
    vec = [0 for _ in range(size)]
    vec[int(val)] = 1
    return vec

def shake_process_x(raw_x_batch):
    x_batch = [word_to_indices(word) for word in raw_x_batch]
    x_batch = np.array(x_batch)
    return x_batch

def shake_process_y(raw_y_batch):
    y_batch = [letter_to_index(c) for c in raw_y_batch]
    return y_batch

def sent_process_x(raw_x_batch,emb_arr,indd,max_words):
    x_batch = [e[4] for e in raw_x_batch]
    x_batch = [line_to_indices(e, indd, max_words) for e in x_batch]
    # x_batch = np.array(x_batch)
    return idx_to_embedding(x_batch,emb_arr)
