# Supplementary material
Source: ML conference proceedings conference paper supplement (https://openaccess.thecvf.com/content/CVPR2022/html/Tang_FedCor_Correlation-Based_Active_CVPR_2022_paper.html)
Supplement: Supplementary file 2 [file Tang_FedCor_Correlation-Based_Active_CVPR_2022_supplemental.zip › supplemental_material/Codes/src/options.py]

#!/usr/bin/env python
# -*- coding: utf-8 -*-
# Python version: 3.6

import argparse


def args_parser():
    parser = argparse.ArgumentParser()

    # federated arguments (Notation for the arguments followed from paper)
    parser.add_argument('--epochs', type=int, default=10,
                        help="number of rounds of training")
    parser.add_argument('--num_users', type=int, default=100,
                        help="total number of clients: N")
    parser.add_argument('--frac', type=float, default=0.1,
                        help='the fraction of clients: C')
    parser.add_argument('--local_ep', type=int, default=10,
                        help="the number of local epochs: E")
    parser.add_argument('--local_bs', type=int, default=10,
                        help="local batch size: B")
    parser.add_argument('--lr', type=float, default=0.01,
                        help='learning rate')
    parser.add_argument('--schedule', type=int, nargs='*', default=[162, 244],
                        help='Decrease learning rate at these rounds.')
    parser.add_argument('--lr_decay',type = float,default=0.1,
                        help = 'Learning rate decay at specified rounds')
    parser.add_argument('--momentum', type=float, default=0.0,
                        help='SGD momentum (default: 0.0)')
    parser.add_argument('--reg', default=1e-4, type=float, 
                        help='weight decay for an optimizer')
    parser.add_argument('--global_average',action = 'store_true',
                        help='use all clients (including which are not updated in this round) for averaging')
    parser.add_argument('--FedProx',action='store_true',
                        help='use FedProx')
    parser.add_argument('--mu',type = float, default=0.0,
                        help = 'mu in FedProx')
    parser.add_argument('--dynamic_mu',action = 'store_true',
                        help='use a dynamic mu for FedProx')

    # GPR arguments
    parser.add_argument('--gpr',action = 'store_true',
                        help = 'activate GP, using without --gpr_selection will construct an off-policy experiment')
    parser.add_argument('--gpr_selection',action = 'store_true',
                        help = 'perform FedGP client selection, must be used with --gpr')
    parser.add_argument('--warmup',type = int, default=25,
                        help = 'length of warm up phase for GP')
    parser.add_argument('--gpr_begin',type = int,default=10,
                        help='the round begin to sample and train GP')
    parser.add_argument('--group_size',type = int, default = 11, 
                        help = 'length of history round to sample for GP, equal to M Delta t + 1 in paper')
    parser.add_argument('--GPR_interval',type = int, default= 5, 
                        help = 'interval of sampling and training of GP, namely, Delta t')
    parser.add_argument('--GPR_gamma',type = float,default = 0.8,
                        help = 'gamma for training GP')
    parser.add_argument('--GPR_Epoch',type=int,default=100,
                        help = 'number of optimization iterations of GP')
    parser.add_argument('--kernel',type = str,default = 'Poly',
                        help = 'kind of kernel used in GP (Poly,SE)')
    parser.add_argument('--poly_norm',type=int,default=0,
                        help='whether to normalize the poly kernel, set 1 to normalize')
    parser.add_argument('--dimension',type = int,default=15,
                        help = 'dimension of embedding in GP')
    parser.add_argument('--train_method',type = str,default='MML',
                        help = 'method of training GP (MML,LOO)')
    parser.add_argument('--discount_method',type = str,default='time',
                        help='use [loss,time] to discount the selection policy')
    parser.add_argument('--loss_power',type = float, default=0.3,
                        help = 'index of loss discount in selection')
    parser.add_argument('--discount',type = float, default=0.9, 
                        help = 'annealing coefficient, i.e., beta in paper')
    parser.add_argument('--epsilon_greedy',type = float,default=0.0,
                        help='use epsilon-greedy in FedGP, set epsilon here')
    parser.add_argument('--dynamic_C',action = 'store_true',
                        help = 'use dynamic GP clients selection')
    parser.add_argument('--dynamic_TH',type = float,default=0.0,
                        help='dynamic selection threshold')
    parser.add_argument('--mvnt',action='store_true',help='Perform Multivariate Normality Test')
    parser.add_argument('--mvn_samples', type = int, default=1000,help = 'Number of samples for each MVN Test')
    parser.add_argument('--mvn_dimensions',type = int, default= 100, help= 'Number of dimensions (clients) for MVN Test')
    parser.add_argument('--mvnt_interval',type = int, default=100, help='Interval for MVN Test')
    parser.add_argument('--mvnt_workers',type=int,default=8,help="Number of workers for MVN sampling")

    # Power-d arguments
    parser.add_argument('--power_d',action = 'store_true',
                        help = 'use Pow-d selection')
    parser.add_argument('--d',type = int,default = 30,
                        help='d in Pow-d selection')

    # Active Federated Learning arguments
    parser.add_argument('--afl',action = 'store_true',
                        help = 'use AFL selection')
    parser.add_argument('--alpha1',type = float,default=0.75,
                        help = 'alpha_1 in ALF')
    parser.add_argument('--alpha2',type = float,default=0.01,
                        help = 'alpha_2 in AFL')
    parser.add_argument('--alpha3',type = float,default=0.1,
                        help='alpha_3 in AFL')

    # model arguments
    parser.add_argument('--model', type=str, default='mlp', 
                        help='model name')
    parser.add_argument('--kernel_sizes', type=int, default=[5,5],nargs="*",
                        help='kernel size in each convolutional layer')
    parser.add_argument('--num_filters', type=int, default=[32,64],nargs = "*",
                        help="number of filters in each convolutional layer.")
    parser.add_argument('--padding', action='store_true', 
                        help='use padding in each convolutional layer')
    parser.add_argument('--mlp_layers',type= int,default=[64,],nargs="*",
                        help="numbers of dimensions of each hidden layer in MLP, or fc layers in CNN")
    parser.add_argument('--depth',type = int,default = 20, 
                        help = "The depth of ResNet. Only valid when model is resnet")
    

    # utils arguments
    parser.add_argument('--dataset', type=str, default='mnist', 
                        help="name of dataset")
    parser.add_argument('--num_classes', type=int, default=10, 
                        help="number of classes")
    parser.add_argument('--gpu', default=None, 
                        help="To use cuda, set to a specific GPU ID. Default set to use CPU.")
    parser.add_argument('--optimizer', type=str, default='sgd', 
                        help="type of optimizer")
    parser.add_argument('--iid', type=int, default=1,
                        help='Default set to IID. Set to 0 for non-IID.')
    parser.add_argument('--shards_per_client',type = int,default=1,
                        help='number of shards for each client')
    parser.add_argument('--unequal', type=int, default=0,
                        help='whether to use unbalanced data splits for non-i.i.d setting (use 0 for equal splits)')
    parser.add_argument('--alpha',type=float,default=None,
                        help="use Dirichlet_noniid sampling, set the alpha of Dir here")
    parser.add_argument('--verbose', type=int, default=1, 
                        help='verbose')
    parser.add_argument('--seed', type=int, default=None, nargs='*', 
                        help='random seed')
    parser.add_argument('--target_accuracy',type=float,default=None,
                        help='stop at a specified test accuracy')
  
    
    args = parser.parse_args()
    return args

def plot_args_parser():
    parser = argparse.ArgumentParser()

    # federated arguments (Notation for the arguments followed from paper)
    parser.add_argument('--epochs', type=int, default=10,
                        help="number of rounds of training")
    parser.add_argument('--num_users', type=int, default=100,
                        help="number of users: K")
    parser.add_argument('--frac', type=float, default=0.1,
                        help='the fraction of clients: C')
    parser.add_argument('--local_ep', type=int, default=10,
                        help="the number of local epochs: E")
    parser.add_argument('--local_prune_ep', type=int, default=10,
                        help="the number of local pruning epochs")
    parser.add_argument('--local_bs', type=int, default=10,
                        help="local batch size: B")
    parser.add_argument('--lr', type=float, default=0.01,
                        help='learning rate')
    parser.add_argument('--schedule', type=int, nargs='*', default=[162, 244],
                        help='Decrease learning rate at these rounds.')
    parser.add_argument('--lr_decay',type = float,default=0.1,
                        help = 'Learning rate decay at specified rounds')
    parser.add_argument('--plr', type=float, default=0.01,
                        help='pruning learning rate')
    parser.add_argument('--momentum', type=float, default=0.0,
                        help='SGD momentum (default: 0.0)')
    parser.add_argument('--reg', default=1e-4, type=float, help='L2 regul')
    parser.add_argument('--global_average',action = 'store_true'
                        ,help='use all clients (including which are not updated in this round) for averaging')
    parser.add_argument('--FedProx',action='store_true',help='use FedProx')
    parser.add_argument('--mu',type = float, default=0.0,help = 'mu in FedProx')
    parser.add_argument('--dynamic_mu',action = 'store_true',help='use a dynamic mu for FedProx')

    # GPR arguments
    parser.add_argument('--gpr',action = 'store_true',help = 'plot gpr')
    parser.add_argument('--warmup',type = int, default=15,help = 'Length of warm up period for GPR')
    parser.add_argument('--gpr_begin',type = int,default=0,help='The epoch begin to sample and train GPR')
    parser.add_argument('--group_size',type = int, default = 11,nargs='+', help = 'Length of training group for GPR')
    parser.add_argument('--GPR_interval',type = int, default= 5,nargs='+', help = 'Interval of sampling and training of GPR')
    parser.add_argument('--GPR_gamma',type = float,default = 0.8,help = 'gamma for training GPR')
    parser.add_argument('--GPR_Epoch',type=int,default=100,help = 'Training Epoch of GPR')
    parser.add_argument('--kernel',type = str,default = 'Poly',help = 'Type of kernel in GPR (Poly,SE)')
    parser.add_argument('--poly_norm',type=int,default=0,help='Whether to normalize the poly kernel, set 1 to normalize')
    parser.add_argument('--dimension',type = int,default=15,help = 'Dimension of embedding space in GPR')
    parser.add_argument('--train_method',type = str,default='MML',help = 'Method of training GPR (MML,LOO)')
    parser.add_argument('--gpr_selection',action = 'store_true',help = 'Use GPR clients selection')
    parser.add_argument('--discount_method',type = str,default='loss',help='Use [loss,time] to discount the selection policy')
    parser.add_argument('--loss_power',type = float, default=0.3,help = 'Power of loss stat in selection')
    parser.add_argument('--discount',type = float, default=0.9,nargs='+', help = 'Time Discount in selection')
    parser.add_argument('--epsilon_greedy',type = float,default=0.0,help='Use epsilon-greedy in GPR selection, set epsilon here')
    parser.add_argument('--dynamic_C',action = 'store_true',help = 'Use Dynamic GPR clients selection')
    parser.add_argument('--dynamic_TH',type = float,default=0.0,help='Dynamic Selection Stop Threshold')
    
    # Power-d arguments
    parser.add_argument('--power_d',action = 'store_true',help = 'plot pow-d')
    parser.add_argument('--d',type = int,default = 30,help='d in power-d selection')

    # Active Federated Learning arguments
    parser.add_argument('--afl',action = 'store_true',help = 'plot afl')
    parser.add_argument('--alpha1',type = float,default=0.75,help = 'Alpha_1 in ALF')
    parser.add_argument('--alpha2',type = float,default=0.01,help = 'Alpha_2 in AFL')
    parser.add_argument('--alpha3',type = float,default=0.1,help='Alpha_3 in AFL')

    # model arguments
    parser.add_argument('--model', type=str, default='mlp', help='model name')
    parser.add_argument('--kernel_sizes', type=int, default=[5,5],nargs="*",
                        help='comma-separated kernel size to \
                        use for convolution')
    parser.add_argument('--num_filters', type=int, default=[32,64],nargs = "*",
                        help="number of filters for conv nets -- 32 for \
                        mini-imagenet, 64 for omiglot.")
    parser.add_argument('--padding', action='store_true', help='use padding in conv2d')
    parser.add_argument('--mlp_layers',type= int,default=[64,],nargs="*",
                        help="Numbers of dimensions of the hidden layers in MLP")
    parser.add_argument('--depth',type = int,default = 20, 
                        help = "The depth of ResNet. Only valid when model is resnet")
    

    # utils arguments
    parser.add_argument('--dataset', type=str, default='mnist', help="name \
                        of dataset")
    parser.add_argument('--num_classes', type=int, default=10, help="number \
                        of classes")
    parser.add_argument('--gpu', default=None, help="To use cuda, set \
                        to a specific GPU ID. Default set to use CPU.")
    parser.add_argument('--optimizer', type=str, default='sgd', help="type \
                        of optimizer")
    parser.add_argument('--iid', type=int, default=1,
                        help='Default set to IID. Set to 0 for non-IID.')
    parser.add_argument('--shards_per_client',type = int,default=1,help='how many shards does one client have in its dataset')
    parser.add_argument('--unequal', type=int, default=0,
                        help='whether to use unequal data splits for  \
                        non-i.i.d setting (use 0 for equal splits)')
    parser.add_argument('--alpha',type=float,default=None,help="Use Dirichlet_noniid sampling")
    parser.add_argument('--verbose', type=int, default=1, help='verbose')
    parser.add_argument('--seed', type=int, default=None, nargs='*', help='random seed')
    parser.add_argument('--target_accuracy',type=float,default=0.5,
                        help='Target test accuracy')

    # plot arguments
    parser.add_argument('--plot_iid',action = 'store_true',help = 'plot iid')
    parser.add_argument('--plot_loss',action = 'store_true',help = 'plot loss')
    parser.add_argument('--legend_norm',action = 'store_true',help = 'plot normal legend')
    parser.add_argument('--legend_int',action = 'store_true',help = 'plot interval legend')
    parser.add_argument('--legend_beta',action = 'store_true',help = 'plot beta legend')
    parser.add_argument('--merge_legend',action='store_true',help='plot the legend with curves')
    parser.add_argument('--plot_tsne',action = 'store_true',help = 'plot tsne')
    parser.add_argument('--plot_gpr0',action = 'store_true',help = 'plot gpr0')
    parser.add_argument('--sep_hist',action = 'store_true',help = 'seperate hist')
    parser.add_argument('--plot_center',action='store_true',help='plot the centeralized accuracy')
    parser.add_argument('--plot_title',action='store_true',help='plot title')

    
    
    args = parser.parse_args()
    return args

if __name__ == '__main__':
    args = args_parser()
    print(args.mlp_layers)
