# Supplementary material
Source: ML conference proceedings conference paper supplement (https://openaccess.thecvf.com/content/CVPR2022/html/Tang_FedCor_Correlation-Based_Active_CVPR_2022_paper.html)
Supplement: Supplementary file 2 [file Tang_FedCor_Correlation-Based_Active_CVPR_2022_supplemental.zip › supplemental_material/Codes/src/sampling.py]

#!/usr/bin/env python
# -*- coding: utf-8 -*-
# Python version: 3.6


import numpy as np
from torchvision import datasets, transforms
from collections import Counter
from torch.distributions.dirichlet import Dirichlet
import torch
import cvxopt
from cvxopt import matrix,solvers
from language_utils import shake_process_x,shake_process_y,sent_process_x,get_word_emb_arr
import json
from tqdm import tqdm
import torch.utils.data as Data


def mnist_iid(dataset, num_users,rs):
    """
    Sample I.I.D. client data from MNIST dataset
    :param dataset:
    :param num_users:
    :return: dict of image index
    """
    num_items = int(len(dataset)/num_users)
    dict_users, all_idxs = {}, [i for i in range(len(dataset))]
    for i in range(num_users):
        dict_users[i] = set(rs.choice(all_idxs, num_items,
                                             replace=False))
        all_idxs = list(set(all_idxs) - dict_users[i])
        dict_users[i] = list(dict_users[i])
    return dict_users


def mnist_noniid(dataset, num_users,shards_per_client,rs):
    """
    Sample non-I.I.D client data from MNIST dataset
    :param dataset:
    :param num_users:
    :return:
    """
    # 60,000 training imgs -->  300 imgs/shard X 200 shards
    num_shards = shards_per_client*num_users
    num_imgs = len(dataset)//num_shards
    idx_shard = [i for i in range(num_shards)]
    dict_users = {i: np.array([]) for i in range(num_users)}
    idxs = np.arange(num_shards*num_imgs)
    labels = dataset.train_labels.numpy()
    # sort labels
    idxs_labels = np.vstack((idxs, labels))
    idxs_labels = idxs_labels[:, idxs_labels[1, :].argsort()]
    idxs = idxs_labels[0, :]

    # divide and assign 2 shards/client
    for i in range(num_users):
        rand_set = set(rs.choice(idx_shard, shards_per_client, replace=False))
        idx_shard = list(set(idx_shard) - rand_set)
        for rand in rand_set:
            dict_users[i] = np.concatenate(
                (dict_users[i], idxs[rand*num_imgs:(rand+1)*num_imgs]), axis=0)
        rs.shuffle(dict_users[i])
    return dict_users


def mnist_noniid_unequal(dataset, num_users,rs):
    """
    Sample non-I.I.D client data from MNIST dataset s.t clients
    have unequal amount of data
    :param dataset:
    :param num_users:
    :returns a dict of clients with each clients assigned certain
    number of training imgs
    """
    # 60,000 training imgs --> 50 imgs/shard X 1200 shards
    num_shards, num_imgs = 1000, len(dataset)//1000
    idx_shard = [i for i in range(num_shards)]
    dict_users = {i: np.array([]) for i in range(num_users)}
    idxs = np.arange(num_shards*num_imgs)
    labels = dataset.train_labels.numpy()

    # sort labels
    idxs_labels = np.vstack((idxs, labels))
    idxs_labels = idxs_labels[:, idxs_labels[1, :].argsort()]
    idxs = idxs_labels[0, :]

    # Minimum and maximum shards assigned per client:
    min_shard = 1
    max_shard = 30

    # Divide the shards into random chunks for every client
    # s.t the sum of these chunks = num_shards
    random_shard_size = rs.randint(min_shard, max_shard+1,
                                          size=num_users)
    random_shard_size = np.around(random_shard_size /
                                  sum(random_shard_size) * num_shards)
    random_shard_size = random_shard_size.astype(int)

    # Assign the shards randomly to each client
    if sum(random_shard_size) > num_shards:

        for i in range(num_users):
            # First assign each client 1 shard to ensure every client has
            # atleast one shard of data
            rand_set = set(rs.choice(idx_shard, 1, replace=False))
            idx_shard = list(set(idx_shard) - rand_set)
            for rand in rand_set:
                dict_users[i] = np.concatenate(
                    (dict_users[i], idxs[rand*num_imgs:(rand+1)*num_imgs]),
                    axis=0)

        random_shard_size = random_shard_size-1

        # Next, randomly assign the remaining shards
        for i in range(num_users):
            if len(idx_shard) == 0:
                continue
            shard_size = random_shard_size[i]
            if shard_size > len(idx_shard):
                shard_size = len(idx_shard)
            rand_set = set(rs.choice(idx_shard, shard_size,
                                            replace=False))
            idx_shard = list(set(idx_shard) - rand_set)
            for rand in rand_set:
                dict_users[i] = np.concatenate(
                    (dict_users[i], idxs[rand*num_imgs:(rand+1)*num_imgs]),
                    axis=0)
    else:

        for i in range(num_users):
            shard_size = random_shard_size[i]
            rand_set = set(rs.choice(idx_shard, shard_size,
                                            replace=False))
            idx_shard = list(set(idx_shard) - rand_set)
            for rand in rand_set:
                dict_users[i] = np.concatenate(
                    (dict_users[i], idxs[rand*num_imgs:(rand+1)*num_imgs]),
                    axis=0)

        if len(idx_shard) > 0:
            # Add the leftover shards to the client with minimum images:
            shard_size = len(idx_shard)
            # Add the remaining shard to the client with lowest data
            k = min(dict_users, key=lambda x: len(dict_users.get(x)))
            rand_set = set(rs.choice(idx_shard, shard_size,
                                            replace=False))
            idx_shard = list(set(idx_shard) - rand_set)
            for rand in rand_set:
                dict_users[k] = np.concatenate(
                    (dict_users[k], idxs[rand*num_imgs:(rand+1)*num_imgs]),
                    axis=0)

    return dict_users


def cifar_iid(dataset, num_users,rs):
    """
    Sample I.I.D. client data from CIFAR10 dataset
    :param dataset:
    :param num_users:
    :return: dict of image index
    """
    num_items = int(len(dataset)//num_users)
    dict_users, all_idxs = {}, [i for i in range(len(dataset))]
    for i in range(num_users):
        dict_users[i] = set(rs.choice(all_idxs, num_items,
                                             replace=False))
        all_idxs = list(set(all_idxs) - dict_users[i])
    return dict_users


def cifar_noniid(dataset, num_users,shards_per_client,rs):
    """
    Sample non-I.I.D client data from CIFAR10 dataset
    :param dataset:
    :param num_users:
    :return:
    """
    num_shards = shards_per_client*num_users
    num_imgs =  len(dataset)//num_shards
    idx_shard = [i for i in range(num_shards)]
    dict_users = {i: np.array([],dtype=np.int64) for i in range(num_users)}
    idxs = np.arange(num_shards*num_imgs)
    # labels = dataset.train_labels.numpy()
    labels = np.array(dataset.targets)

    # sort labels
    idxs_labels = np.vstack((idxs, labels))
    idxs_labels = idxs_labels[:, idxs_labels[1, :].argsort()]
    idxs = idxs_labels[0, :]

    # divide and assign
    for i in range(num_users):
        rand_set = set(rs.choice(idx_shard, shards_per_client, replace=False))
        idx_shard = list(set(idx_shard) - rand_set)
        for rand in rand_set:
            dict_users[i] = np.concatenate(
                (dict_users[i], idxs[rand*num_imgs:(rand+1)*num_imgs]), axis=0)
        rs.shuffle(dict_users[i])
    return dict_users

def Dirichlet_noniid(dataset,num_users,alpha,rs):
    """
    Sample dataset with dirichlet distribution and concentration parameter alpha
    """
    # img_num_per_client = len(dataset)//num_users
    dict_users = {i: np.array([],dtype=np.int64) for i in range(num_users)}
    idxs = np.arange(len(dataset))
    # labels = dataset.train_labels.numpy()
    labels = np.array(dataset.targets)
    num_classes = np.max(labels)+1
    labels_idxs = []
    prior_class_distribution = np.zeros(num_classes)
    b = np.zeros(num_classes)
    for i in range(num_classes):
        labels_idxs.append(idxs[labels==i])
        prior_class_distribution[i] = len(labels_idxs[i])/len(dataset)
        b[i]=len(labels_idxs[i])
    
    data_ratio = np.zeros([num_classes,num_users])
    if isinstance(alpha,list):
        for i in range(num_users):
            data_ratio[:,i] = rs.dirichlet(prior_class_distribution*alpha[i])
    else:
        data_ratio = np.transpose(rs.dirichlet(prior_class_distribution*alpha,size=num_users))
    # data_ratio = data_ratio/np.sum(data_ratio,axis=1,keepdims=True)
    # Client_DataSize = len(dataset)//num_users*np.ones([num_users,1],dtype=np.int64)
    A = matrix(data_ratio)
    b = matrix(b)
    G = matrix(-np.eye(num_users))
    h = matrix(np.zeros([num_users,1]))
    P = matrix(np.eye(num_users))
    q = matrix(np.zeros([num_users,1]))
    results = solvers.qp(P,q,G,h,A,b)
    Client_DataSize = np.array(results['x'])
    # print(Client_DataSize)
    Data_Division = data_ratio*np.transpose(Client_DataSize)
    rest = []
    for label in range(num_classes):
        for client in range(num_users):
            data_idx = rs.choice(labels_idxs[label],int(Data_Division[label,client]),replace=False)
            dict_users[client] = np.concatenate([dict_users[client],data_idx],0)
            labels_idxs[label] = list(set(labels_idxs[label])-set(data_idx))
        rest = rest+labels_idxs[label]

    rest_clients = rs.choice(range(num_users),len(rest),replace = True)
    
    for n,user in enumerate(rest_clients):
        dict_users[user] = np.append(dict_users[user],rest[n])

    for user in range(num_users):
        rs.shuffle(dict_users[user])
    # print(data_ratio[:,:10])
    return dict_users,data_ratio
    # # sort labels
    # idxs_labels = np.vstack((idxs, labels))
    # idxs_labels = idxs_labels[:, idxs_labels[1, :].argsort()]
    # idxs = idxs_labels[0, :]

    # prior_class_stat = Counter(labels)
    # # print(prior_class_stat)
    # prior_class_ditribution = np.zeros(max(labels)+1)
    # for label in range(max(labels)+1):
    #     prior_class_ditribution[label] = prior_class_stat[label]/len(dataset)
    # dist = Dirichlet(torch.tensor(alpha)*torch.tensor(prior_class_ditribution))
    # for i in range(num_users):
    #     class_distribution = dist.sample().detach().numpy()
    #     img_num_per_class = (img_num_per_client*class_distribution).astype(np.int64)
    #     img_num_per_class[-1]+=img_num_per_client-np.sum(img_num_per_class,dtype=np.int64)
    #     # print(img_num_per_class)
    #     label_start = 0
    #     for l in range(max(labels)+1):
    #         dict_users[i] =np.concatenate([dict_users[i],
    #                                       rs.choice(idxs[label_start:label_start+prior_class_stat[l]],
    #                                                        img_num_per_class[l],replace = False)],0)
    #         label_start = label_start+prior_class_stat[l]
    #     rs.shuffle(dict_users[i])
    # return dict_users

def shakespeare(data_dir,spc,rs):
    trainx = torch.tensor([], dtype = torch.uint8)
    trainy = torch.tensor([], dtype = torch.uint8)
    testx = torch.tensor([], dtype = torch.uint8)
    testy = torch.tensor([], dtype = torch.uint8)
    try:
        trainx = torch.load(data_dir+'train/xdata.pt')
        trainy = torch.load(data_dir+'train/ydata.pt')
        user_groups = torch.load(data_dir+'train/user_groups.pt')
        testx  = torch.load(data_dir+'test/xdata.pt')
        testy = torch.load(data_dir+'test/ydata.pt')
        
    except: 
        # prepare training set
        user_groups = {}
        start = 0
        with open(data_dir+'train/data.json', 'r') as inf:
            data = json.load(inf)
        for n,u in enumerate(tqdm(data['users'])):
            temp_x = shake_process_x(data['user_data'][u]['x'])
            temp_y = shake_process_y(data['user_data'][u]['y'])
            # print(temp_y[0])
            trainx = torch.cat((trainx, torch.tensor(temp_x, dtype = torch.uint8)))
            trainy = torch.cat((trainy, torch.tensor(temp_y, dtype = torch.uint8)))
            user_groups[n]=np.arange(start,start+len(temp_x))
            start+=len(temp_x)
        # trainy = torch.argmax(trainy,1)
        torch.save(trainx, data_dir+'train/xdata.pt')
        torch.save(trainy, data_dir+'train/ydata.pt')
        torch.save(user_groups,data_dir+'train/user_groups.pt')

        # prepare test set
        with open(data_dir+'test/data.json', 'r') as inf:
            data = json.load(inf)
        for u in tqdm(data['users']):
            temp_x = shake_process_x(data['user_data'][u]['x'])
            temp_y = shake_process_y(data['user_data'][u]['y'])
            testx = torch.cat((testx, torch.tensor(temp_x, dtype = torch.uint8)))
            testy = torch.cat((testy, torch.tensor(temp_y, dtype = torch.uint8)))
        # testy = torch.argmax(testy,1)
        torch.save(testx, data_dir+'test/xdata.pt')
        torch.save(testy, data_dir+'test/ydata.pt')
    
    train_dataset = Data.TensorDataset(trainx.long(),trainy.long()) 
    test_dataset = Data.TensorDataset(testx.long(), testy.long())
    if spc>1:
        new_user_groups = {}
        remain_role = set(range(len(user_groups.keys())))
        i=0
        while len(remain_role)>=spc:
            idxs = []
            s = rs.choice(list(remain_role),spc,replace=False)
            remain_role-=set(s)
            for r in s:
                idxs.append(user_groups[r])
            new_user_groups[i]=np.concatenate(idxs,0)
            i+=1
        user_groups=new_user_groups
    return train_dataset,test_dataset,user_groups

def sent140(data_dir,spc,rs):
    emb_arr,indd,_ = get_word_emb_arr(data_dir+'embs.json')
    trainx = torch.tensor([], dtype = torch.uint8)
    trainy = torch.tensor([], dtype = torch.uint8)
    testx = torch.tensor([], dtype = torch.uint8)
    testy = torch.tensor([], dtype = torch.uint8)
    try:
        trainx = torch.load(data_dir+'train/xdata.pt')
        trainy = torch.load(data_dir+'train/ydata.pt')
        user_groups = torch.load(data_dir+'train/user_groups.pt')
        testx  = torch.load(data_dir+'test/xdata.pt')
        testy = torch.load(data_dir+'test/ydata.pt')
        
    except: 
        # prepare training set
        user_groups = {}
        start = 0
        with open(data_dir+'train/data.json', 'r') as inf:
            data = json.load(inf)
        for n,u in enumerate(tqdm(data['users'])):
            temp_x = sent_process_x(data['user_data'][u]['x'],emb_arr,indd,25)
            temp_y = data['user_data'][u]['y']
            # print(temp_y[0])
            trainx = torch.cat((trainx, torch.tensor(temp_x)))
            trainy = torch.cat((trainy, torch.tensor(temp_y, dtype = torch.uint8)))
            user_groups[n]=np.arange(start,start+len(temp_x))
            start+=len(temp_x)
        # trainy = torch.argmax(trainy,1)
        torch.save(trainx, data_dir+'train/xdata.pt')
        torch.save(trainy, data_dir+'train/ydata.pt')
        torch.save(user_groups,data_dir+'train/user_groups.pt')

        # prepare test set
        with open(data_dir+'test/data.json', 'r') as inf:
            data = json.load(inf)
        for u in tqdm(data['users']):
            temp_x = sent_process_x(data['user_data'][u]['x'],emb_arr,indd,25)
            temp_y = data['user_data'][u]['y']
            testx = torch.cat((testx, torch.tensor(temp_x)))
            testy = torch.cat((testy, torch.tensor(temp_y, dtype = torch.uint8)))
        # testy = torch.argmax(testy,1)
        torch.save(testx, data_dir+'test/xdata.pt')
        torch.save(testy, data_dir+'test/ydata.pt')
    
    train_dataset = Data.TensorDataset(trainx.float(),trainy.long()) 
    test_dataset = Data.TensorDataset(testx.float(), testy.long())
    if spc>1:
        new_user_groups = {}
        remain_role = set(range(len(user_groups.keys())))
        i=0
        while len(remain_role)>=spc:
            idxs = []
            s = rs.choice(list(remain_role),spc,replace=False)
            remain_role-=set(s)
            for r in s:
                idxs.append(user_groups[r])
            new_user_groups[i]=np.concatenate(idxs,0)
            i+=1
        user_groups=new_user_groups
    return train_dataset,test_dataset,user_groups

if __name__ == '__main__':
    dataset_train = datasets.CIFAR10('./data/cifar/', train=True, download=True,
                                   transform=transforms.Compose([
                                       transforms.ToTensor(),
                                       transforms.Normalize((0.5, 0.5, 0.5), (0.5, 0.5, 0.5))
                                   ]))
    num = 100
    d = cifar_noniid(dataset_train, num,1,np.random.RandomState(1))
    # print(d[50])
    
    for i in range(num):
        c = Counter(np.array(dataset_train.targets)[d[i]])
        # print(ratio[:,i])
        print(c)
        input()
    
